1 **Breadth of humoral immune responses to the C-terminus of the circumsporozoite**  
2 **protein is associated with protective efficacy induced by the RTS,S malaria vaccine**

3  
4  
5

6 Sidhartha Chaudhury<sup>1</sup>, Randall S. MacGill<sup>2</sup>, Angela M. Early<sup>3</sup>, Jessica S. Bolton<sup>4</sup>, C. Richter King<sup>2</sup>,  
7 Emily Locke<sup>2</sup>, Tony Pierson<sup>4</sup>, Dyann F. Wirth<sup>3</sup>, Daniel E. Neafsey<sup>3</sup>, Elke S. Bergmann-Leitner<sup>4\*</sup>

8

9 <sup>1</sup> Center for Enabling Capabilities, WRAIR, Silver Spring, MD 20910

10 <sup>2</sup> PATH's Malaria Vaccine Initiative, Washington, DC 20001, USA.

11 <sup>3</sup> Broad Institute of MIT and Harvard T.H. Chan School of Public Health, Cambridge, MA 02142

12 <sup>4</sup> Immunology Core, Malaria Biologics Branch, WRAIR, Silver Spring, MD 20910

13

14

15

16

17 Corresponding author:

18 Elke S. Bergmann-Leitner, MSc PhD

19 email; [elke.s.bergmann-leitner.civ@mail.mil](mailto:elke.s.bergmann-leitner.civ@mail.mil)

20

21

22 Keywords

23 Serology, circumsporozoite protein, polymorphism, vaccine, protection, malaria

24

25 **Abstract**

26 The circumsporozoite protein (CSP) is the main surface antigen of malaria sporozoites and a prime  
27 vaccine target. Responses induced by the CSP-based RTS,S vaccine towards the polymorphic C-terminal  
28 region of *P.falciparum*-CSP raise concerns that vaccines using single alleles may have lower efficacy  
29 against genotypic variants. We characterized the extent of C-terminal cross-reactivity of antibodies  
30 induced by RTS,S (based on the 3D7 allele) with variants representing seven circulating field isolates  
31 through a novel HTS-multiplex assay for screening closely related peptides. Reactivity to variants showed  
32 approximately 30-fold reduction in recognition relative to 3D7. The degree of reduced cross-reactivity,  
33 ranging from 21 to 69-fold, directly correlated with the number of polymorphisms between variants and  
34 3D7. Surprisingly, protection assessed by challenge with 3D7 parasites was strongly associated with  
35 higher C-terminal antibody breadth suggesting that C-terminal specific avidity or fine-specificity may  
36 play a role in RTS,S/AS01<sub>B</sub>-mediated protection and that breadth of C-terminal CSP-specific antibody  
37 responses may be a marker of protection.

38

## 39 Abbreviations

|    |       |                                                                      |
|----|-------|----------------------------------------------------------------------|
| 40 | AS    | Adjuvant system (GSK nomenclature)                                   |
| 41 | CHMI  | Controlled human malaria infection                                   |
| 42 | CSP   | Circumsporozoite protein                                             |
| 43 | ECLIA | Electro-chemiluminescence                                            |
| 44 | MLS   | Mean luminescence signal                                             |
| 45 | MSD   | Mesoscale Diagnostics                                                |
| 46 | NK    | Natural killer cells                                                 |
| 47 | RTS,S | Scientific name of malaria vaccine indicating the vaccine components |
| 48 | Th_R  | Helper T region                                                      |
| 49 | TSR   | Thrombospondin repeat                                                |
| 50 |       |                                                                      |

## 51 Introduction

52 Most malaria parasite antigens exhibit extensive population-level diversity, resulting from  
53 millennia of selection pressure to escape naturally acquired immunity [1]. The Circumsporozoite Protein  
54 (CSP) is the main surface antigen on the infecting sporozoite and has been targeted by a variety of pre-  
55 erythrocytic vaccines. The leading *Plasmodium falciparum* CSP-based vaccine is RTS,S/AS01<sub>E</sub> which  
56 received a positive scientific opinion (under Article 58) from the European Medical Agency in 2015, and  
57 is currently subject to pilot implementation in three African countries with high malaria endemicity [2, 3].  
58 A study conducted in Malawi that focused on T cell epitopes characterized the naturally occurring  
59 variation in CSP and found evidence that naturally-acquired immunity provides selective pressure on the  
60 CSP C-terminus [4]. Further evidence of such immune pressure was provided by sequencing the CSP C-  
61 terminus polymorphisms of *P. falciparum* infecting unprotected RTS,S/AS01<sub>E</sub>-vaccinated children (ages  
62 5-17 months). The genetic diversity of parasites in vaccinated subjects demonstrated that vaccination  
63 leads to improved protection against 3D7-matched parasites [5]. This implies vaccine efficacy could be  
64 partially dependent on matching the C-term allele(s) to those prevalent among parasites in the geographic  
65 region of vaccine deployment.

66 Polymorphism in the CSP C-terminus presumably reflects a balance between immunity driven  
67 selection and constraints to preserve protein function. The C-terminus of CSP is crucial for invading  
68 hepatocytes and, therefore, for successful infection of the liver and establishment of the disease [6]. Field  
69 data from a Phase III trial in African children and infants has demonstrated the importance of C-terminal  
70 responses in RTS,S/AS01<sub>E</sub>-mediated protection [7]. This study also identified polymorphisms within the  
71 C-terminus of the CSP that are associated with vaccine efficacy. The variant sequences associated with  
72 protection identified in clinical field samples [5] represent the foundation for the present study.

73 Previous studies have not found a consistent association between immune responses to the CSP  
74 C-terminus and vaccine efficacy. Antibodies targeting the C-terminus have been associated with  
75 phagocytic activity, but the phagocytic opsonization index was found to be negatively correlated with

76 protection in a phase 2 RTS,S trial [8]. A recent systems serology study extended protective correlates to  
77 NK cell activity and other Fc-mediated activities [9]. A recent study of B-cell responses in malaria-naïve  
78 adults who were vaccinated with live sporozoites identified only 2 out of 215 antibodies that were specific  
79 to the C-terminus from subjects who were protected from subsequent challenge infections, and these  
80 antibodies did not exhibit neutralizing characteristics *in vitro* or confer protection in mice challenged with  
81 PfCSP transgenic *Plasmodium berghei* parasites [10]. However, analysis of IgG in plasma/serum from  
82 subjects in the RTS,S/AS01<sub>E</sub> phase 3 trial found protection to be significantly correlated with IgG avidity  
83 to the CSP C-terminus, suggesting this region plays an important but complex role in vaccine-induced  
84 protection [7, 11].

85 We recently adapted an electro-chemiluminescence based (ECLIA) multiplex platform to test  
86 serological responses to closely related antigens without cross reactivity due to antigenic similarity and  
87 competition. Moreover, the assay platform has a very high sensitivity with exceptionally low inter- and  
88 intra-assay variability (manuscript submitted). It enables monitoring the reactivity of either vaccine-  
89 induced anti-CSP antibodies or naturally acquired antibodies induced to the currently known C-terminal  
90 variants of the CSP.

91 The objective of the current study was to determine whether the breadth of the humoral immune  
92 response to CSP C-terminus variants can predict vaccine efficacy and protection. Pre-immune *vs.* immune  
93 sera from an RTS,S Phase IIa clinical trial assessing protective efficacy in U.S. adults [12] were tested for  
94 reactivity against peptides representing CSP-variants identified in the above-mentioned field study [5]. In  
95 this study, volunteers received RTS,S formulated with AS01<sub>B</sub> or AS02<sub>A</sub>, and no difference in serological  
96 responses was observed between the different formulations, consistent with pre-clinical studies [13]. The  
97 results indicate that protected individuals react against a wider range of peptides, i.e. breadth of response  
98 to variant peptides, compared to individuals who are not protected following controlled human malaria  
99 infection (CHMI). These results can be used to guide the refinement of the design of CSP-based malaria  
100 vaccines to develop a vaccine with increased breadth of reactivity to C-terminal variants, which may be a  
101 correlate of protection in RTS,S vaccinated subjects.

## 102 Materials and Methods

### 103 Peptides

104 Eight biotinylated PfCSP C-terminal peptides were produced by CS Bio (Menlo Park, CA) and  
105 provided by PATH (CSP aa 283-375). Sequences are listed in Table 1. This region of the CSP C-terminus  
106 spans most of the non-repeat region of the RTS,S vaccine construct (CSP aa 272-389) and harbors many  
107 highly polymorphic amino acid positions presumably selected by naturally acquired immune responses,  
108 and for which a subset were observed to be associated with allele-specific vaccine protection in a previous  
109 study [5].

### 110 Antibodies

111 Pre-immune and day of challenge sera (two weeks post third immunization from a previously  
112 conducted clinical trial (NCT00075049) [12] in which study participants vaccinated with RTS,S  
113 adjuvanted in AS01<sub>B</sub> or AS02<sub>A</sub> (n =15 protected subjects, n =11 non-protected subjects) were tested for  
114 reactivity against C-terminal peptides. Preliminary experiments did not show differences between the two  
115 vaccine cohorts in their reactivity to the variant peptides. The serum sample use was reviewed by the  
116 WRAIR Human Subjects' Protection Branch which determined that the research does not involve human  
117 subjects (NHSR protocol WRAIR#2142) as the samples used were de-identified and no link between  
118 samples and subjects exists. A human CSP-immune serum pool (CSP-AV) and commercial human AB  
119 pooled serum were used as positive and negative assay controls respectively.

### 120 Mesoscale Diagnostics

121 The experiments were conducted using the U-PLEX assay platform (Mesoscale Discovery  
122 (MSD) Inc, Gaithersburg, MD) as previously reported [14]. In brief, individual biotinylated peptides were  
123 incubated with the proprietary U-PLEX MSD linkers designed to bind to respective spots on 10-spot  
124 MSD multi-array 96 plates. U-PLEX linker-coupled peptides were combined into a cocktail containing all  
125 eight peptides (*i.e.*, H12, H13, H18, H234, H3, H50, Pf16-MVI, Pf16-H1; 300 nM of each pre-linked

126 peptide). Plates were coated overnight at 4°C and washed three times with 1x Wash Buffer (MSD).  
127 Serum samples were diluted 1:5,000 with assay diluent (diluent 2, MSD) and incubated for 1 hour at RT  
128 on shaker. Plates were washed and incubated with goat-anti-human IgG (H+L) secondary antibody  
129 conjugated to Sulfotag (MSD, 1 µg/ml final concentration) in diluent 3 for 1 hour at RT on shaker. Plates  
130 were washed and 2x Read Buffer T (MSD) was added prior to reading the plates in the Meso Quickplex  
131 SQ120 per the manufacturer's instructions. Data were reported as mean luminescence signal (MLS).

132

### 133 B cell epitope predictions

134 Sequences of the variant and 3D7 C-terminus were used as the input for the sequence-based  
135 linear B cell epitope predictions using BepiPred [15]. The crystal structure deposited in the Protein Data  
136 Bank (PD ID code 3VDJ) [16] was used for predicting conformational epitopes in the 3D7 sequence with  
137 the Discotope method [17]. The tools were accessed through the Immune Epitope Database  
138 ([www.iedb.org](http://www.iedb.org))[18].

139

### 140 Statistics

141 Univariate analysis between protected and unprotected subjects was performed to determine the  
142 correlation between MSD intensity (reactivity) to the various peptides and protection. Prior to any t-test,  
143 we carried out a Shapiro-Wilks test to determine if the to-be-compared data points were normally  
144 distributed. If both were normally distributed ( $p < 0.05$  by the Shapiro-Wilks test), we applied a Student's  
145 t-test; if either distribution was not normally distributed, we applied the Wilcoxon signed-rank test.

146

147 To express the breadth of the immune response, first the relative response of individual sera to the  
148 different variant peptides was calculated ( $P_x = \text{MLS to peptide } y / \text{MLS to 3D7 allele}$ ) and then the median  
149 response across all tested variant peptides was calculated (breadth = median ( $P_{3D7}, P_{H1}, P_{H33}, P_{H12}, P_{H50},$   
150  $P_{H13}, P_{H18}, P_{H234}$ )). Binomial logistics regression was performed to estimate the probability of protection

151 based on antibody breadth. Correlations and correlation matrices were calculated and plotted using R  
152 software. R script and data are available upon request.

153

#### 154 Data availability

155 All analysis scripts used in this study were written in R and are available freely for download at [https://](https://github.com/BHSAI/immstat)  
156 [github.com/BHSAI/immstat](https://github.com/BHSAI/immstat). Experimental data and protocols are made available upon request to  
157 corresponding author.

158



## 159 Results

### 160 Design of C-terminal CSP variant peptides

161 Seven C-terminal peptides were selected from a database of naturally occurring CSP sequences observed  
162 in the RTS,S/AS01<sub>E</sub> phase III ancillary genotyping study [5]. Each peptide contains varying degrees of  
163 similarity to the 3D7 vaccine construct at polymorphic amino acid positions, including those observed in  
164 the Phase III ancillary genotyping study to contribute to differential vaccine efficacy [5]. Previous studies  
165 of CSP have highlighted three regions hypothesized to serve as T-cell epitopes [19] and/or B-cell epitopes  
166 [20, 21]: DV10 (positions 293-302), Th2R (positions 311-327) and Th3R (positions 352-363). Figure 1  
167 aligns the seven peptide constructs along the 3D7 sequence (peptide MVI-Pf16) and indicates highly  
168 polymorphic positions within the DV10, Th2R, and Th3R epitope regions. The magnitude of  
169 polymorphism observed in the phase III ancillary genotyping study [5] is represented by potentially  
170 balanced polymorphisms, indicating positions where the major allele is present with a frequency < 80%,  
171 and whether or not a position was a ‘sieve site’ (associated with differential vaccine efficacy) [5]. Three  
172 of the four positions with the highest sequence entropy occur in Th2R, specifically 318E, 321N, and  
173 322K, along with one position (352N) in Th3R (not shown). The H18 peptide has the smallest Hamming  
174 distance to 3D7, with five mismatching amino acid positions; H50 is the most distant from 3D7 with 10  
175 mismatches.

### 176 Reactivity of RTS,S-immune sera to variant C-terminal CSP peptides

177 Sera from RTS,S-vaccinated subjects were tested using an ECLIA-based multiplex platform (MSD) for  
178 reactivity against C-terminal CSP variants that represent prevalent parasite strains across Africa. As  
179 expected, we found reactivity to the 3D7 peptide higher than the variant peptides in all cases (Figure 2A,  
180 Supplementary Figure 1). We observed on average, reactivity to the CSP variants showed a 30-fold  
181 reduction in signal intensity relative to 3D7, ranging from as low as 21-fold reduction to as high as 69-  
182 fold reduction across the seven variants. Additionally, there was a relationship between the degree of  
183 reduction in signal relative to 3D7 and the Hamming distance between that peptide and 3D7. H234 and

184 H18, for example, were matching or highly similar to 3D7 at one epitope and showed a 21-fold and 25-  
185 fold reduction in signal, respectively, while H50, which was the most divergent sequence from 3D7 had a  
186 69-fold reduction. Interestingly, the two peptides with the weakest cross-reactivity, H13 and H50, also  
187 display the greatest divergence from the five critical sieve site residues identified by Neafsey et al [5].  
188 Both H13 and H50 contain K317E, P354S, D356N, A361E mutations, possibly impacting linear and/or  
189 conformational epitopes.

190

191         Stratifying the results based on protective status revealed (Supplementary Figure 2 and Figure  
192 2B): 1) magnitude of the response to the 3D7 peptide did not discern between protected and non-protected  
193 individuals; (2) magnitude of the response to several peptides (H18, H12, H3, and H1) was significantly  
194 higher in protected individuals than non-protected individuals ( $p < 0.05$  for H18, H12, and H3;  $p < 0.01$   
195 for H1). We also observed that this difference in protection status was mainly found in peptides with more  
196 modest differences from 3D7 – for example responses to H50 (Hamming distance of 10 from 3D7)  
197 showed no significant difference with respect to protection status, while responses to H18 (Hamming  
198 distance of 4) did. Overall among the peptides for which reactivity showed significant differences  
199 between protected and non-protected individuals, protected individuals showed approximately a 2-fold  
200 higher signal than non-protected individuals (Figure 2B).

## 201 Breadth of CSP antibody response and protection

202         We sought to quantify the breadth of the antibody response in terms of its reactivity across *all*  
203 CSP variants in this study and assess its relationship to protection. We defined antibody breadth of a  
204 given sample as the median response across all the seven CSP variant peptides relative to its response to  
205 the 3D7 peptide. We compared this measure of antibody breadth by protection status (Figure 3A) and  
206 found that protected individuals had significantly higher breadth in their antibody responses than non-  
207 protected individuals ( $p < 0.01$ ). We compared the antibody breadth relative to the antibody response to  
208 3D7 to determine if the magnitude of the 3D7 response played a role in determining antibody breadth, but

209 found no correlation between the two measures (Figure 3B). To further explore the association between  
210 breadth of antibody response to C-terminal peptides and protection, subjects were binned by antibody  
211 response breadth into three bins of equal width (Figure 3C). A binomial logistic regression to estimate the  
212 probability of protection from antibody breadth revealed that breadth is associated with the outcome  
213 ( $p=0.062$ ), suggesting that the greater the breadth of a subject's antibody response, the more likely a  
214 subject is to be protected. The model suggests that a subject with low antibody response breadth (100-fold  
215 reduction in median signal between 3D7 and the CSP variants) has a 28% chance of protection while a  
216 subject with high antibody response breadth (10-fold reduction in median signal between 3D7 and the  
217 CSP variants) has a 84% chance of protection.

218         Given that the overall breadth shows an association with protection, we sought to determine  
219 whether reactivity of the serum to pairs of peptides could provide additional insight. Using a correlation  
220 analysis, we identified peptides that show high correlation (i.e. subjects that show a high response to one  
221 peptide also show a high response to another or vice versa), suggesting that the antibodies in that sample  
222 are binding to epitopes in a cross-reactive manner between the two peptides. Conversely, peptides that  
223 show low correlation (i.e. a subject shows a high response to one peptide but a low response to another)  
224 suggests that antibodies in that sample are binding to epitopes in an allele-specific manner. Cross-  
225 reactivity in the antibody response can arise from two factors: 1) binding of antibodies to conserved  
226 epitopes and 2) binding of antibodies to conserved positions of otherwise largely polymorphic epitopes.

227  
228         For protected subjects, we found that all peptides showed high correlation with each other ( $p<$   
229  $0.05$ , Pearson correlation), suggesting that for these subjects, the antibody response appears to be cross-  
230 reactive across all eight peptides (Figure 4A). By contrast, for non-protected subjects we observed weak  
231 correlation between responses to 3D7 and the other CSP variants and a moderate correlation between all  
232 non-3D7 CSP variants, suggesting that their responses are largely allele-specific for 3D7. In both  
233 protected and non-protected subjects, the correlation between responses to all non-3D7 variants may

234 reflect binding to conserved epitope positions. For protected vaccinees, this correlation extends to 3D7 as  
235 well, indicating in these subjects, RTS,S elicited responses that predominantly target conserved epitope  
236 positions. By contrast, for non-protected vaccinees, the lack of correlation between 3D7 and the other  
237 variants suggests that for these subjects, RTS,S-elicited responses target polymorphic epitope positions  
238 that are unique to 3D7 and exhibit high (albeit non-protective) 3D7 allele specificity.

239  
240         Supplementary Figure 3 shows representative cases for peptides H3 and H13 to illustrate this  
241 effect. In a comparison of responses to 3D7 and H3 across protected and non-protected subjects  
242 (Supplementary Figure 3A), protected subjects show a strong correlation ( $R^2 = 0.57$ ,  $p < 0.01$ ) while non-  
243 protected subjects do not ( $R^2 = 0.14$ ). Likewise, in a comparison of responses between 3D7 and H13  
244 (Supplementary Figure 3B), protected subjects also show a strong correlation ( $R^2 = 0.60$ ,  $p < 0.01$ ), while  
245 non-protected subjects do not ( $R^2 = 0.13$ ). By contrast, in a comparison between responses between two  
246 non-3D7 alleles, H3 and H13 (Supplementary Figure 3C), protected subjects show a very high correlation  
247 ( $R^2 = 0.96$ ,  $p < 10^{-3}$ ) and non-protected subjects show a correlation as well ( $R^2 = 0.65$ ,  $p < 0.05$ ). One  
248 interpretation for these results is 1) the correlation between the non-3D7 alleles and 3D7 in protected  
249 subjects suggests a significant portion of the RTS,S-induced response in these subjects is cross-reactive  
250 and 2) the correlation between responses to non-3D7 alleles suggests that cross-reactive portion of the  
251 RTS,S-induced response is broadly cross-reactive across non-3D7 alleles.

252  
253         Next, the correlation analysis was stratified based on the overall ELISA titer to the 3D7 C-  
254 terminus (*i.e.*, high titer *vs.* low titer in both, protected and non-protected groups) (Figure 4B and 4C).  
255 The stratification based on antibody titer and protection status revealed that antibody titers are not  
256 responsible for the distinct antibody reactivities against C-terminal variant peptides. Furthermore, we see  
257 distinct differences between high-titer and low-titer non-protected subjects. For low-titers, there is a high  
258 correlation across all the peptides, suggesting that responses in these subjects are targeting conserved

259 epitope positions across these peptides. However, non-protected subjects with high C-term titers show a  
260 strikingly different pattern with a *negative* correlation between 3D7 and the non-3D7 alleles. This  
261 indicates for these subjects a stronger 3D7 response corresponded to a *weaker* non-3D7 response,  
262 suggesting non-protected subjects with high C-term titers are characterized by strong antibody responses  
263 towards 3D7-specific epitopes.

264

## 265 Epitope prediction and structural modeling

266         Given the potential role of fine specificity in determining antibody breadth and its association  
267 with protection, we sought to characterize the antibody epitopes on the CSP C-terminal region. We  
268 carried out sequence- and structure-based epitope prediction (Figure 5A). The C-terminal region of CSP  
269 consists of a disordered linker region that connects the C-terminal region with the NANP repeat region  
270 and an ordered thrombospondin-like repeat domain unique to CSP termed the  $\alpha$ -thrombospondin repeat  
271 (TSR) domain. We carried out linear epitope prediction on the linker region using the BepiPred algorithm  
272 [15] and found a major epitope region from positions 284-311. This region includes the DV10 epitope  
273 and has been previously reported to be an epitope recognized by sera from individuals immunized with  
274 irradiated sporozoites as well as by sera from children living in malaria endemic areas [20].

275         We used the crystal structure of the  $\alpha$ -TSR domain [16] of CSP for structure-based epitope  
276 prediction using the DiscoTope algorithm [17]. The algorithm identified two epitope regions – residues  
277 311-331 and residues 342-367. These conformational epitopes correspond to the polymorphic Th2R and  
278 Th3R, respectively. The epitope containing the Th2R region (AA311-331) has been previously described  
279 as a B cell epitope in humans, rodents, and nonhuman primates providing some validation of these  
280 predictions [22, 23]. We mapped the epitope regions onto the structure of the CSP C-terminal region  
281 (Figure 5B). The Th2R and Th3R polymorphic regions map onto the two unique aspects of the CSP  
282  $\alpha$ -TSR domain – the  $\alpha$ -helix in region III and the CSP ‘flap’, respectively. The  $\alpha$ -TSR domain itself is  
283 highly conserved. Overall, based on the structural modeling there appear to be three overlapping epitope

284 regions – the polymorphic  $\alpha$ -helix region (containing Th2R), the polymorphic CSP-flap (containing  
285 Th3R), and the conserved ‘back-face’ of the  $\alpha$ -TSR domain.

286           Given the potential role of conserved epitopes or epitope positions in determining antibody  
287 breadth, our structural modeling suggests that the major conserved epitope region lies along the back-face  
288 of the  $\alpha$ -TSR domain, while polymorphic epitopes are primarily found on the ‘front-face’, along the  $\alpha$ -  
289 helix of Region III and the CSP-flap that make up the Th2R and Th3R polymorphic regions, respectively.  
290 Our results suggest that, responses in non-protected subjects with high C-term titers may be mostly  
291 focused on these polymorphic epitopes.

292

## 293 Discussion

294 While antibody responses to the CSP central repeats are known critical mediators of  
295 RTS,S/AS01<sub>E</sub> vaccine efficacy, this is the first report revealing the relationship between breadth of  
296 antibody responses to different CSP C-term variants and protection from *P.falciparum* infection following  
297 RTS,S immunization. There are several potential strategies to improve the RTS,S/AS01<sub>E</sub> vaccine efficacy  
298 and extend the durability of protection. First, efficacy could be boosted by broadening the immune  
299 responses to the C-terminus of CSP, which is known to be crucial for the function of the parasite and may  
300 contribute to increased vaccine efficacy. CSP can assume two different conformations: the non-adhesive  
301 conformation during migration of the parasite to the target tissue (i.e., salivary gland in the mosquito and  
302 liver in the mammalian host) and the adhesive form when preparing for invasion [6, 24]. When assuming  
303 the non-adhesive conformation, the N-terminus of the CSP folds over the C-terminus thus shielding it  
304 from potential immune attacks (such as antibodies or complement [25]). Most epitopes of the C-terminus  
305 are only accessible for antibody binding when the CSP assumes its adhesive conformation [24].  
306 Analyzing the differences between these two forms of CSP reveals the importance of the C-terminus for  
307 invasion, as the N-terminus of the CSP will protect this region during the sporozoite's journey to its target  
308 tissue. Reports investigating the relationship between the epitope specificity of C-terminal monoclonal  
309 antibodies (mAbs) and their functional activity have shown that mAbs binding to the  $\alpha$ -TSR have limited  
310 functional activity, likely because most epitopes are masked by the N-terminus (non-adhesive  
311 conformation) unless the parasite prepares for host cell invasion [10, 26]. In contrast, all tested mAbs  
312 binding to repeat and C-terminus have been shown to be invasion-inhibitory, while mAbs binding only to  
313 the  $\alpha$ -TSR have limited functionality [26]. Selective immune pressure may be responsible for the  
314 increased frequencies of polymorphisms in the C-terminus, which is a balancing act between immune  
315 escape and maintaining functionality. The present study provides an insight into the breadth of C-terminal  
316 antibody specificities induced by RTS,S, given the tested samples were from malaria-naïve RTS,S  
317 vaccinees. The results also inform the potency of the vaccine in priming cross-reactive responses to other

318 CSP C-terminal variants. Overall, we found that signal intensities corresponding to antibody titers were  
319 ~20- to 70-fold lower in the vaccine-mismatch alleles compared to the vaccine-matched 3D7 allele. While  
320 antibody responses clearly play a critical role in RTS,S-mediated protection, it is not known what  
321 consequences this reduction in reactivity in the C-terminal CSP response has for protection against  
322 diverse *P.falciparum* strains found in malaria endemic regions.

323 As has been the case in previous RTS,S studies [7, 8], there was not a significant difference in  
324 antibody titers to the C-terminal region of CSP between protected and non-protected subjects. However,  
325 interestingly, we did find that serum antibodies from protected subjects had higher reactivity to several  
326 CSP variant peptides than non-protected subjects. Furthermore, using a measure of antibody breadth  
327 based on the median response across all CSP C-terminal variants, protected subjects showed greater  
328 breadth than non-protected subjects. Logistic regression revealed a possible quantitative relationship  
329 between breadth and protection – subjects with only a ~10-fold decrease in reactivity to the CSP variants  
330 compared to 3D7 had a >80% chance of protection, while subjects that showed greater than 100-fold  
331 decrease in reactivity to the CSP variants had only a 28% chance of protection. This link between  
332 antibody breadth and protection is puzzling given that the subjects were exposed to a homologous  
333 challenge, for which antibody breadth alone would play no obvious role in protection.

334 One possible explanation is that apparent breadth of the antibody response may be a proxy for  
335 fine-specificity – or relative response to different CSP C-terminal epitopes. An antibody response that  
336 predominantly targets conserved epitopes would be expected to show strong antibody breadth across all  
337 CSP variants, while an antibody response that primarily targets polymorphic epitopes would be expected  
338 to show allele-specific behavior, and correspondingly, weak breadth. Using correlation analysis between  
339 the antibody reactivities to the CSP variant peptides, we showed that protected subjects had a strong  
340 correlation across all the CSP variant peptides, suggesting their antibody responses were focused  
341 primarily on conserved epitope positions. By contrast, non-protected subjects, and particularly non-  
342 protected subjects with high CSP titers, show low or even negative correlation between their 3D7



343 response and their response to the CSP variants, suggesting that in these subjects, RTS,S is eliciting  
344 responses predominantly towards polymorphic positions of the 3D7 CSP.

345         Using structural modeling of the  $\alpha$ -TSR domain of the C-terminal region of CSP, we show that  
346 the polymorphic epitope regions, Th2R and Th3R, are primarily found in the  $\alpha$ -helix in Region III and the  
347 ‘CSP-flap’ [16]. Interestingly, these structural features of the  $\alpha$ -TSR region of CSP are unique to the *P.*  
348 *falciparum* protein and not found in any other  $\alpha$ -TSR or  $\alpha$ -TSR-like domain structure [16], suggesting  
349 possible functional significance or selective pressure. Epitope prediction in conjunction with structure  
350 modeling shows that polymorphic epitopes of CSP C-term are primarily found on the same ‘front-face’ of  
351 the protein, near the linker region that connects the  $\alpha$ -TSR domain to the NANP repeat region, while  
352 conserved epitopes along the highly conserved  $\alpha$ -TSR domain are primarily found on the opposite face, or  
353 ‘back-face’. Given this arrangement of conserved and polymorphic epitope positions along the CSP  
354 structure, it is possible that antibody responses with differing degrees of cross-reactivity have different  
355 fine-specificities with respect to which epitope regions they bind to.

356         Although antibody responses to CSP have long been recognized as important for protection  
357 against infection, the work reported here represents the first systematic study to dissect the association  
358 between protection and fine specificity of antibody responses (*i.e.*, potential epitopes in the C-terminus) to  
359 this region as has been reported for CSP-repeat specific antibodies [27, 28]. The role of C-terminal  
360 antibodies has been debated in the literature, with some reports demonstrating the importance of C-  
361 terminal antibodies in protection [7, 29] while others have shown a lack of functionality [10]. Our  
362 findings suggest that the conserved TSR region of the C-terminus may contain key protective epitopes  
363 that may be of great interest to vaccine design, especially in light of the possibility that antigenic  
364 mismatch due to polymorphisms in the CSP C-terminal region may limit RTS,S vaccine efficacy [5, 30].  
365 Finally, our study suggests that the overall breadth of the antibody response across CSP C-terminal  
366 variants may be a marker for protection in CSP-based vaccines.

367

## 368 Figure Legends

369

370 *Figure 1: CSP-variant peptide sequence alignment and distance from 3D7. A) Multiple sequence*  
371 *alignment of the seven variant peptides, compared with 3D7, along the DV10, Th2R, and Th3R epitope*  
372 *regions. Mismatched residues are shown in black. Hamming distance to 3D7 is shown for each peptide*  
373 *variant along with information on differential cumulative vaccine efficacy and potential balanced*  
374 *polymorphisms. B) ‘Sieve site’ Hamming Distance and Total Hamming Distance of the CSP-variant*  
375 *peptides and 3D7.*

376 *Figure 2: Serum reactivity of RTS,S-immune sera with 3D7 and seven variant CSP peptides. Dot plot*  
377 *summarizes reactivity of 26 vaccinees to the eight C-terminal peptides (A). Data expressed as net*  
378 *luminescence signal (signal of pre-immune sera subtracted; mean luminescence signal of CSP-negative*  
379 *sera  $357 \pm 120$ ). Data were also stratified by protection status (blue for protected, red for non-protected)*  
380 *and shown as a fold change relative to 3D7 (B). Peptides are ordered in increasing sieve Hamming*  
381 *Distance, left to right, from 3D7. Peptides are ordered in increasing sieve-site Hamming Distance, left to*  
382 *right, from 3D7. Statistical significance shown with asterisks (\*  $p < 0.05$ ; \*\*  $p < 0.01$ ; \*\*\*  $p < 0.001$ ).*

383 *Figure 3: Breadth of the response to C-terminal CSP peptides is associated with protection. A) The*  
384 *breadth of the antibody response was expressed as median response across all tested variant peptides*  
385 *relative to 3D7. Data stratified into protected (blue) vs non-protected (red dots) (\*\*  $p < 0.01$ , Student’s t-*  
386 *test). B) Scatterplot showing breadth of antibody response compared to MSD intensity to 3D7; no*  
387 *significant correlation was seen in protected or non-protected subjects. C) Logistic regression was*  
388 *carried out with subjects binned into three bins based on relative breadth (circle size corresponds to*  
389 *sample size in bin; whiskers indicate 95% confidence interval). Estimated probability of protection based*  
390 *on antibody breadth shown with 95% confidence interval in blue.*

391 *Figure 4. Antibody profile of protected vs. non-protected RTS,S immunized vaccinees to C-terminal*  
392 *peptides. Correlation matrices indicate the relationship between the magnitudes of the antibody*  
393 *responses to the various C-terminal peptides. The color and size of the dots (scale below graphs) indicate*  
394 *the degree of correlation between the different CSP peptides (small to large indicating low to high*  
395 *correlation). Correlation matrices stratified by protected status for all subjects (A), and separately*  
396 *subjects with high antibody titers ('high responders') (B) and subjects with low antibody titers ('low*  
397 *responders') (C). CSP-variant peptides are arranged based on clustering analysis to group peptides with*  
398 *similar patterns of responses together.*

399  
400 *Figure 5 Sequence alignment, domain map, and structure of the C-terminal region of CSP. A) Sequences*  
401 *of CSP variants are aligned with 3D7 with polymorphisms highlighted in yellow and the DV10, Th2R and*  
402 *Th3R regions bound in red. The domain map of CSP C-term is shown with the linker region (gray),  $\alpha$ -*  
403 *Region III (magenta), CS-flap (cyan), and  $\alpha$ -TSR domain (dark blue). B) The structure of the  $\alpha$ -TSR*  
404 *domain of CSP (PDB: 3VDJ) is shown in colors that correspond to the domain map, with polymorphic*  
405 *sites highlighted in red. Predicted epitope regions are shown in a 'surface' depiction on the structure.*

406

407

## 408   References

- 409   [1] Rich SM, Ferreira MU, Ayala FJ. The origin of antigenic diversity in *Plasmodium falciparum*.  
410   Parasitology today (Personal ed). 2000;16:390-6.
- 411   [2] Cohen J, Nussenzweig V, Nussenzweig R, Vekemans J, Leach A. From the circumsporozoite protein  
412   to the RTS, S/AS candidate vaccine. Human vaccines. 2010;6:90-6.
- 413   [3] Laurens MB. RTS,S/AS01 vaccine (Mosquirix): an overview. Hum Vaccin Immunother.  
414   2020;16:480-9.
- 415   [4] Bailey JA, Mvalo T, Aragam N, Weiser M, Congdon S, Kamwendo D, et al. Use of massively parallel  
416   pyrosequencing to evaluate the diversity of and selection on *Plasmodium falciparum* CSP T-cell epitopes  
417   in Lilongwe, Malawi. J Infect Dis. 2012;206:580-7.
- 418   [5] Neafsey DE, Juraska M, Bedford T, Benkeser D, Valim C, Griggs A, et al. Genetic Diversity and  
419   Protective Efficacy of the RTS,S/AS01 Malaria Vaccine. The New England journal of medicine.  
420   2015;373:2025-37.
- 421   [6] Coppi A, Natarajan R, Pradel G, Bennett BL, James ER, Roggero MA, et al. The malaria  
422   circumsporozoite protein has two functional domains, each with distinct roles as sporozoites journey from  
423   mosquito to mammalian host. J Exp Med. 2011;208:341-56.
- 424   [7] Dobano C, Sanz H, Sorgho H, Dosoo D, Mpina M, Ubillos I, et al. Concentration and avidity of  
425   antibodies to different circumsporozoite epitopes correlate with RTS,S/AS01E malaria vaccine efficacy.  
426   Nat Commun. 2019;10:2174.
- 427   [8] Chaudhury S, Ockenhouse CF, Regules JA, Dutta S, Wallqvist A, Jongert E, et al. The biological  
428   function of antibodies induced by the RTS,S/AS01 malaria vaccine candidate is determined by their fine  
429   specificity. Malar J. 2016;15:301.
- 430   [9] Suscovich TJ, Fallon JK, Das J, Demas AR, Crain J, Linde CH, et al. Mapping functional humoral  
431   correlates of protection against malaria challenge following RTS,S/AS01 vaccination. Sci Transl Med.  
432   2020;12.

- 433 [10] Scally SW, Murugan R, Bosch A, Triller G, Costa G, Mordmuller B, et al. Rare PfCSP C-terminal  
434 antibodies induced by live sporozoite vaccination are ineffective against malaria infection. *J Exp Med*.  
435 2018;215:63-75.
- 436 [11] Ubillos I, Ayestaran A, Nhabomba AJ, Dosoo D, Vidal M, Jiménez A, et al. Baseline exposure,  
437 antibody subclass, and hepatitis B response differentially affect malaria protective immunity following  
438 RTS,S/AS01E vaccination in African children. *BMC Med*. 2018;16:197.
- 439 [12] Kester KE, Cummings JF, Ofori-Anyinam O, Ockenhouse CF, Krzych U, Moris P, et al.  
440 Randomized, double-blind, phase 2a trial of falciparum malaria vaccines RTS,S/AS01B and  
441 RTS,S/AS02A in malaria-naïve adults: safety, efficacy, and immunologic associates of protection. *J*  
442 *Infect Dis*. 2009;200:337-46.
- 443 [13] Stewart VA, McGrath SM, Walsh DS, Davis S, Hess AS, Ware LA, et al. Pre-clinical evaluation of  
444 new adjuvant formulations to improve the immunogenicity of the malaria vaccine RTS,S/AS02A.  
445 *Vaccine*. 2006;24:6483-92.
- 446 [14] Bolton JS, Chaudhury S, Dutta S, Gregory S, Locke E, Pierson T, et al. Comparison of ELISA with  
447 electro-chemiluminescence technology for the qualitative and quantitative assessment of serological  
448 responses to vaccination. *Malar J*. 2020;19:159.
- 449 [15] Larsen JE, Lund O, Nielsen M. Improved method for predicting linear B-cell epitopes. *Immunome*  
450 *research*. 2006;2:2.
- 451 [16] Doud MB, Koksai AC, Mi LZ, Song G, Lu C, Springer TA. Unexpected fold in the circumsporozoite  
452 protein target of malaria vaccines. *Proc Natl Acad Sci U S A*. 2012;109:7817-22.
- 453 [17] Kringelum JV, Lundegaard C, Lund O, Nielsen M. Reliable B cell epitope predictions: impacts of  
454 method development and improved benchmarking. *PLoS computational biology*. 2012;8:e1002829.
- 455 [18] Vita R, Mahajan S, Overton JA, Dhanda SK, Martini S, Cantrell JR, et al. The Immune Epitope  
456 Database (IEDB): 2018 update. *Nucleic acids research*. 2019;47:D339-d43.

- 457 [19] Good MF, Pombo D, Quakyi IA, Riley EM, Houghten RA, Menon A, et al. Human T-cell  
458 recognition of the circumsporozoite protein of *Plasmodium falciparum*: immunodominant T-cell domains  
459 map to the polymorphic regions of the molecule. *Proc Natl Acad Sci U S A*. 1988;85:1199-203.
- 460 [20] Calle JM, Nardin EH, Clavijo P, Boudin C, Stuber D, Takacs B, et al. Recognition of different  
461 domains of the *Plasmodium falciparum* CS protein by the sera of naturally infected individuals compared  
462 with those of sporozoite-immunized volunteers. *Journal of immunology* (Baltimore, Md : 1950).  
463 1992;149:2695-701.
- 464 [21] Shi YP, Udhayakumar V, Alpers MP, Pova MM, Oloo AJ, Ruebush TK, 2nd, et al. Natural  
465 antibody responses against the non-repeat-sequence-based B-cell epitopes of the *Plasmodium falciparum*  
466 circumsporozoite protein. *Infection and immunity*. 1993;61:2425-33.
- 467 [22] Birkett A, Lyons K, Schmidt A, Boyd D, Oliveira GA, Siddique A, et al. A modified hepatitis B  
468 virus core particle containing multiple epitopes of the *Plasmodium falciparum* circumsporozoite protein  
469 provides a highly immunogenic malaria vaccine in preclinical analyses in rodent and primate hosts.  
470 *Infection and immunity*. 2002;70:6860-70.
- 471 [23] Nardin EH, Calvo-Calle JM, Oliveira GA, Nussenzweig RS, Schneider M, Tiercy JM, et al. A totally  
472 synthetic polyoxime malaria vaccine containing *Plasmodium falciparum* B cell and universal T cell  
473 epitopes elicits immune responses in volunteers of diverse HLA types. *Journal of immunology*  
474 (Baltimore, Md : 1950). 2001;166:481-9.
- 475 [24] Herrera R, Anderson C, Kumar K, Molina-Cruz A, Nguyen V, Burkhardt M, et al. Reversible  
476 Conformational Change in the *Plasmodium falciparum* Circumsporozoite Protein Masks Its Adhesion  
477 Domains. *Infection and immunity*. 2015;83:3771-80.
- 478 [25] Bergmann-Leitner ES, Scheiblhofer S, Weiss R, Duncan EH, Leitner WW, Chen D, et al. C3d  
479 binding to the circumsporozoite protein carboxy-terminus deviates immunity against malaria. *Int*  
480 *Immunol*. 2005;17:245-55.
- 481 [26] Murugan R, Buchauer L, Triller G, Kreschel C, Costa G, Pidelaserra Martí G, et al. Clonal selection  
482 drives protective memory B cell responses in controlled human malaria infection. *Sci Immunol*. 2018;3.

- 483 [27] Oyen D, Torres JL, Wille-Reece U, Ockenhouse CF, Emerling D, Glanville J, et al. Structural basis  
484 for antibody recognition of the NANP repeats in Plasmodium falciparum circumsporozoite protein. Proc  
485 Natl Acad Sci U S A. 2017;114:E10438-e45.
- 486 [28] Pholcharee T, Oyen D, Torres JL, Flores-Garcia Y, Martin GM, Gonzalez-Paez GE, et al. Diverse  
487 Antibody Responses to Conserved Structural Motifs in Plasmodium falciparum Circumsporozoite  
488 Protein. J Mol Biol. 2019.
- 489 [29] Ubillos I, Ayestaran A, Nhabomba AJ, Dosoo D, Vidal M, Jimenez A, et al. Baseline exposure,  
490 antibody subclass, and hepatitis B response differentially affect malaria protective immunity following  
491 RTS,S/AS01E vaccination in African children. BMC Med. 2018;16:197.
- 492 [30] Pringle JC, Carpi G, Almagro-Garcia J, Zhu SJ, Kobayashi T, Mulenga M, et al. RTS,S/AS01  
493 malaria vaccine mismatch observed among Plasmodium falciparum isolates from southern and central  
494 Africa and globally. Scientific reports. 2018;8:6622.
- 495
- 496

497 **Acknowledgements**

498 The authors would like to thank CPT Jennifer Kookan, Ms. Tanisha Robinson, and Ms. Elizabeth Duncan  
499 for facilitating work at various stages, and reviewers at GSK including Opokua Ofori-Anyinam, Lode  
500 Schuerman, Giuseppe Chiapparo, Erik Jongert, and Sophie Racine for their valuable comments.

501 The clinical trial NCT00075049 was sponsored by the US Army Medical Research and Development  
502 Command in collaboration with Walter Reed Army Institute of Research (WRAIR) and GlaxoSmithKline  
503 Biologicals SA (GSK). GSK was provided the opportunity to review a preliminary version of this  
504 manuscript for factual accuracy, but the authors are solely responsible for final content and interpretation.

505

506 **Funding**

507 This study was funded by PATH's Malaria Vaccine Initiative.

508

509 **Authors' contributions**

510 JB performed the experiments and SC performed the statistical analysis. EL, CRK, RM, AE, DW, DN  
511 provided critical reagents and information for the study. EB-L designed the experiments; EB-L and SC  
512 compiled the manuscript. All authors contributed by scientific discussions and input. All authors reviewed  
513 and edited the manuscript.

514

515 **Competing interests**

516 The authors declare that they have no competing interests.

517

518 **Declarations**

519 EB-L, TP, and SC are government employees. Title 17 U.S.C. § 105 provides that "Copyright protection  
520 under this title is not available for any work of the United States Government, but the United States  
521 Government". Title 17 U.S.C. § 101 defines US Government work as "work prepared by a military  
522 service member or employee of the US Government as part of that person's official duties".



523

524 **Disclaimer**

525 Material has been reviewed by the Walter Reed Army Institute of Research. There is no objection to its  
526 presentation and/or publication. The opinions or assertions contained herein are the private views of the  
527 authors, and are not to be construed as official, or as reflecting the views of the Department of the Army  
528 or the Department of Defense. The investigators have adhered to the policies for protection of human  
529 subjects as prescribed in AR 70-25. This paper has been approved for public release with unlimited  
530 distribution.

Figure 1

**A**

| Position                                 | 294  | 295 | 296 | 298 | 299 | 301 | 302  | 303 | 314 | 317 | 318 | 320 | 321 | 322 | 324 | 327 | 349  | 352 | 354 | 356 | 357 | 359 | 361 | 376 |  |
|------------------------------------------|------|-----|-----|-----|-----|-----|------|-----|-----|-----|-----|-----|-----|-----|-----|-----|------|-----|-----|-----|-----|-----|-----|-----|--|
| Epitope                                  | DV10 |     |     |     |     |     | Th2R |     |     |     |     |     |     |     |     |     | Th3R |     |     |     |     |     |     |     |  |
| Differential Cumulative Vaccine Efficacy |      |     |     |     |     |     |      |     |     |     |     |     |     |     |     |     |      |     |     |     |     |     |     |     |  |
| Potential balanced polymorphisms         |      |     |     |     |     |     |      |     |     |     |     |     |     |     |     |     |      |     |     |     |     |     |     |     |  |
| <b>3D7</b>                               | D    | E   | N   | N   | A   | S   | A    | V   | K   | K   | E   | L   | N   | K   | Q   | L   | G    | N   | P   | D   | E   | D   | A   | S   |  |
| H1                                       | D    | E   | N   | K   | A   | N   | A    | V   | K   | E   | Q   | L   | K   | T   | Q   | L   | G    | N   | P   | D   | Q   | D   | E   | S   |  |
| H3                                       | D    | E   | N   | N   | A   | N   | A    | V   | Q   | E   | K   | L   | K   | T   | K   | L   | G    | N   | P   | D   | Q   | D   | A   | S   |  |
| H12                                      | D    | E   | N   | N   | A   | N   | A    | V   | Q   | E   | K   | L   | Q   | K   | Q   | L   | G    | N   | P   | D   | Q   | N   | E   | S   |  |
| H50                                      | D    | E   | N   | N   | A   | N   | A    | V   | K   | E   | Q   | L   | K   | T   | K   | L   | G    | G   | S   | N   | E   | D   | E   | S   |  |
| H13                                      | D    | E   | N   | N   | A   | N   | A    | V   | K   | T   | E   | L   | K   | R   | Q   | L   | G    | G   | S   | N   | E   | D   | E   | S   |  |
| H18                                      | D    | E   | N   | N   | A   | N   | A    | V   | K   | K   | E   | L   | N   | K   | Q   | I   | G    | D   | P   | D   | Q   | D   | I   | S   |  |
| H234                                     | D    | E   | N   | N   | A   | S   | A    | V   | Q   | E   | K   | L   | K   | T   | K   | L   | G    | N   | P   | D   | E   | D   | A   | S   |  |

**B**

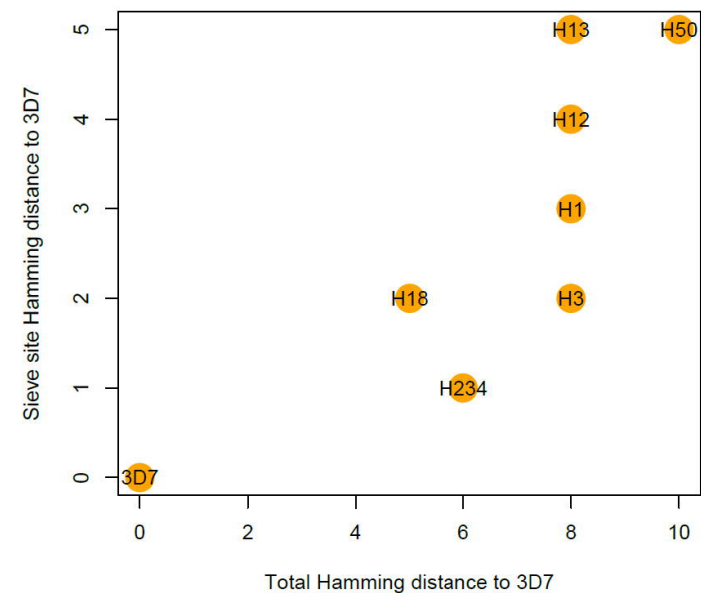

Figure 2

**A**

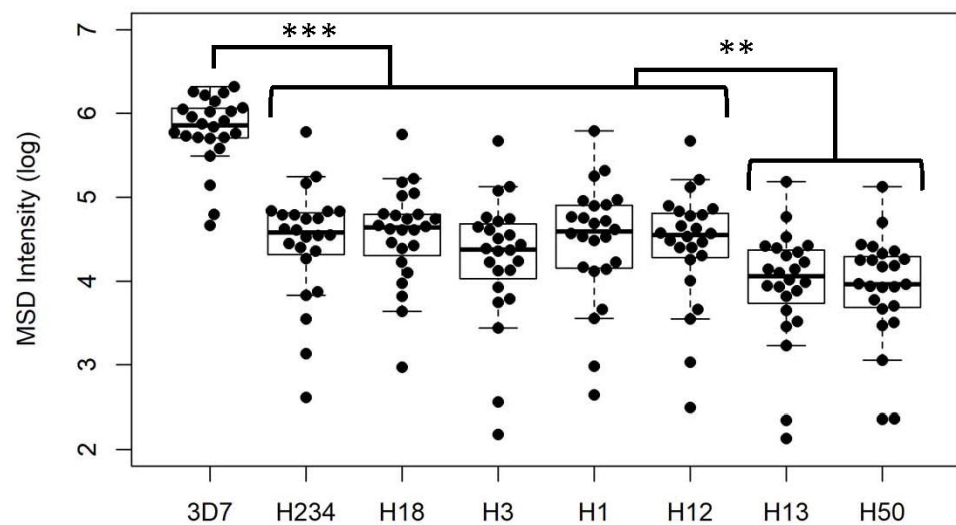

**B**

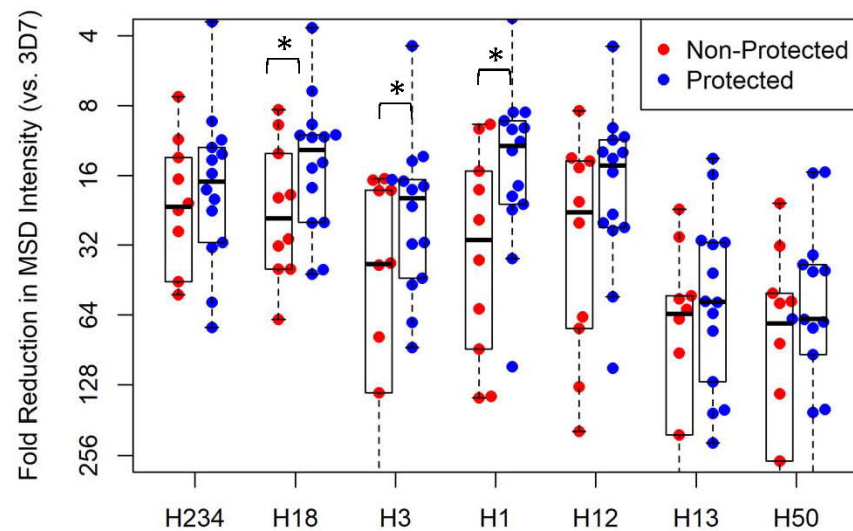

Figure 3

**A**

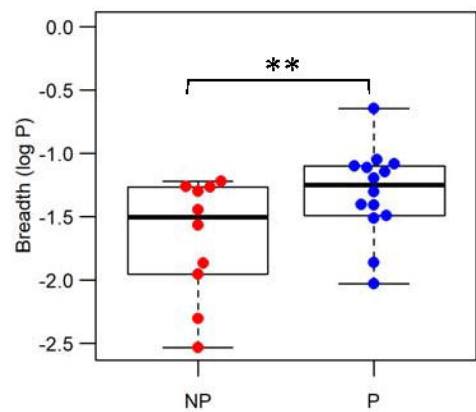

**B**

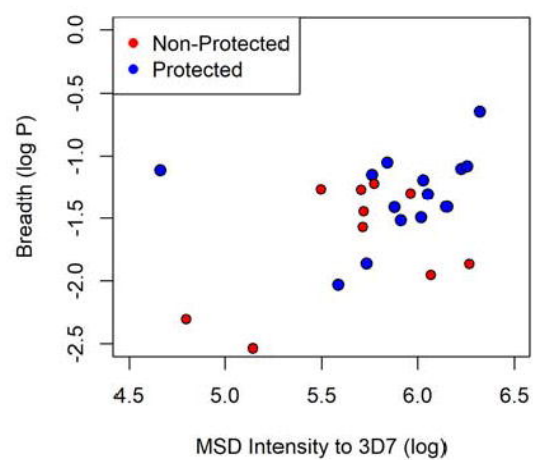

**C**

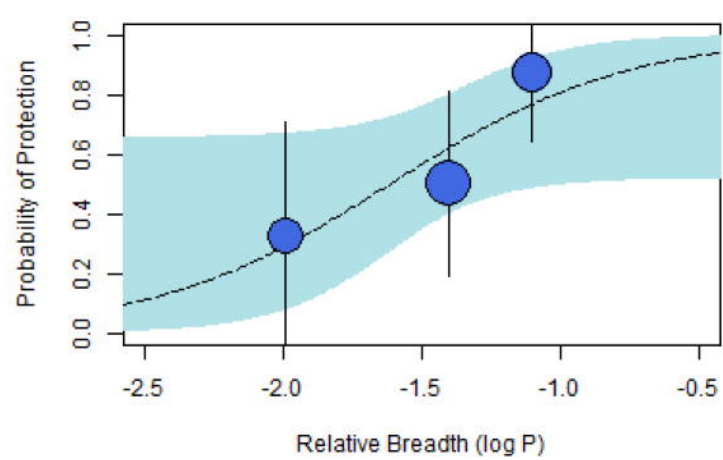

Figure 4

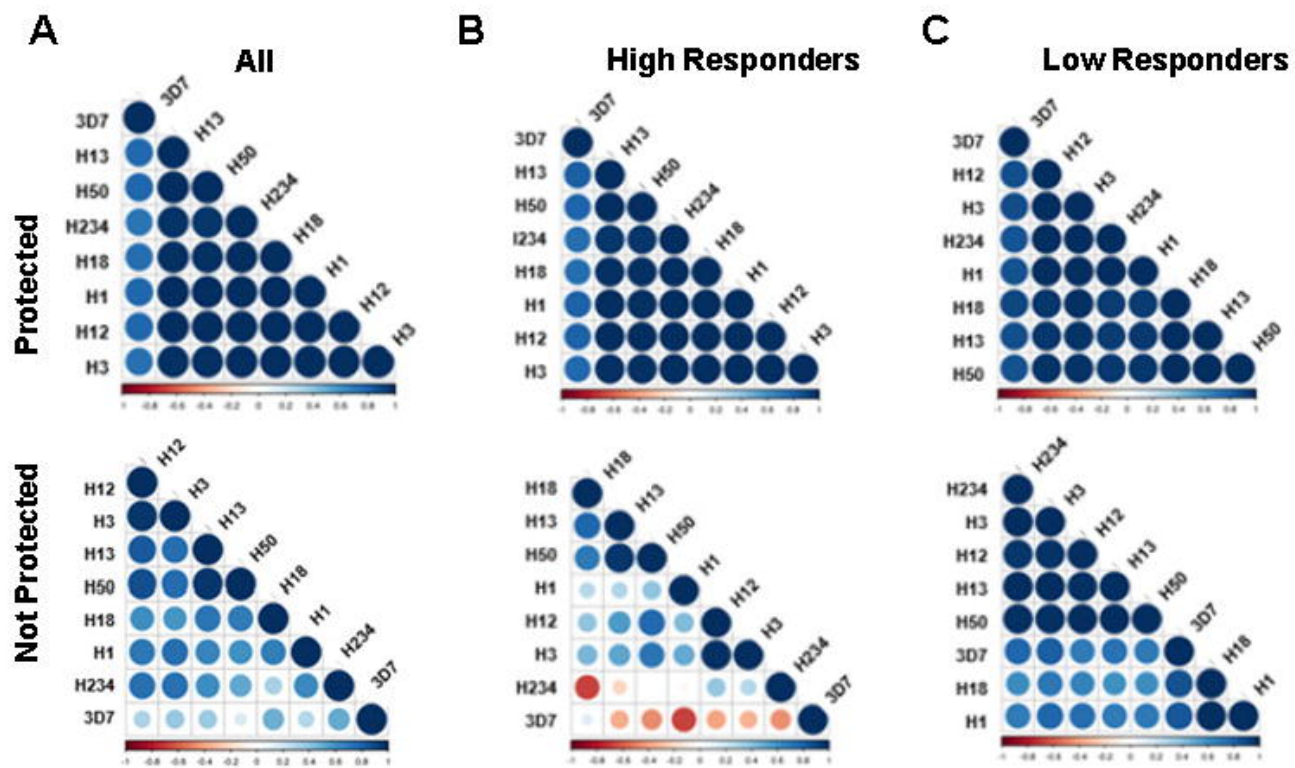

Figure 5

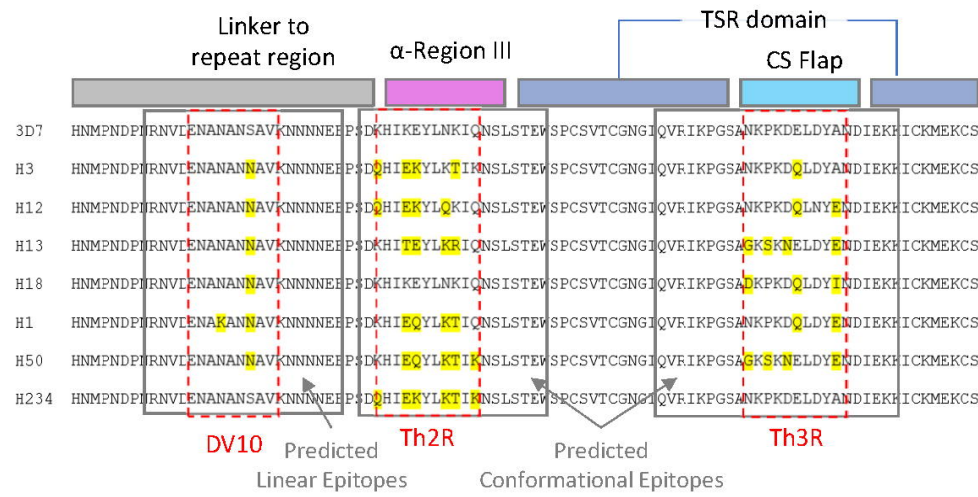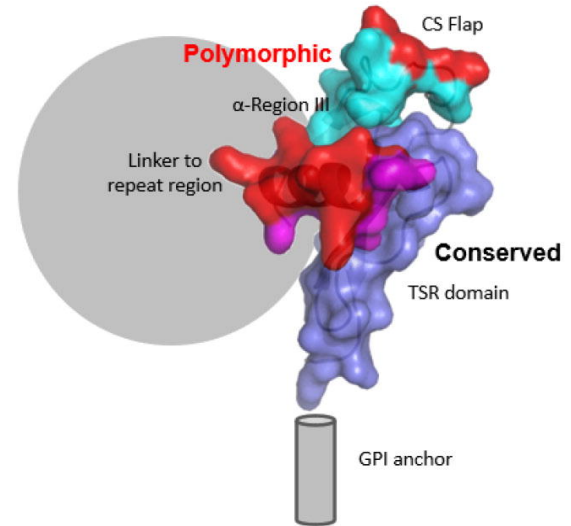

Source: https://medrxiv.org/content/10.1101/2020.11.15.20232033v1.full.pdf
